# Supplementary material
Source: publisher figshare collection journal article supplement (https://frontiersin.figshare.com/ndownloader/files/27920580)
Supplement: Supplementary file 1 [file 27920580]

Supplementary Material (Supplement 1)


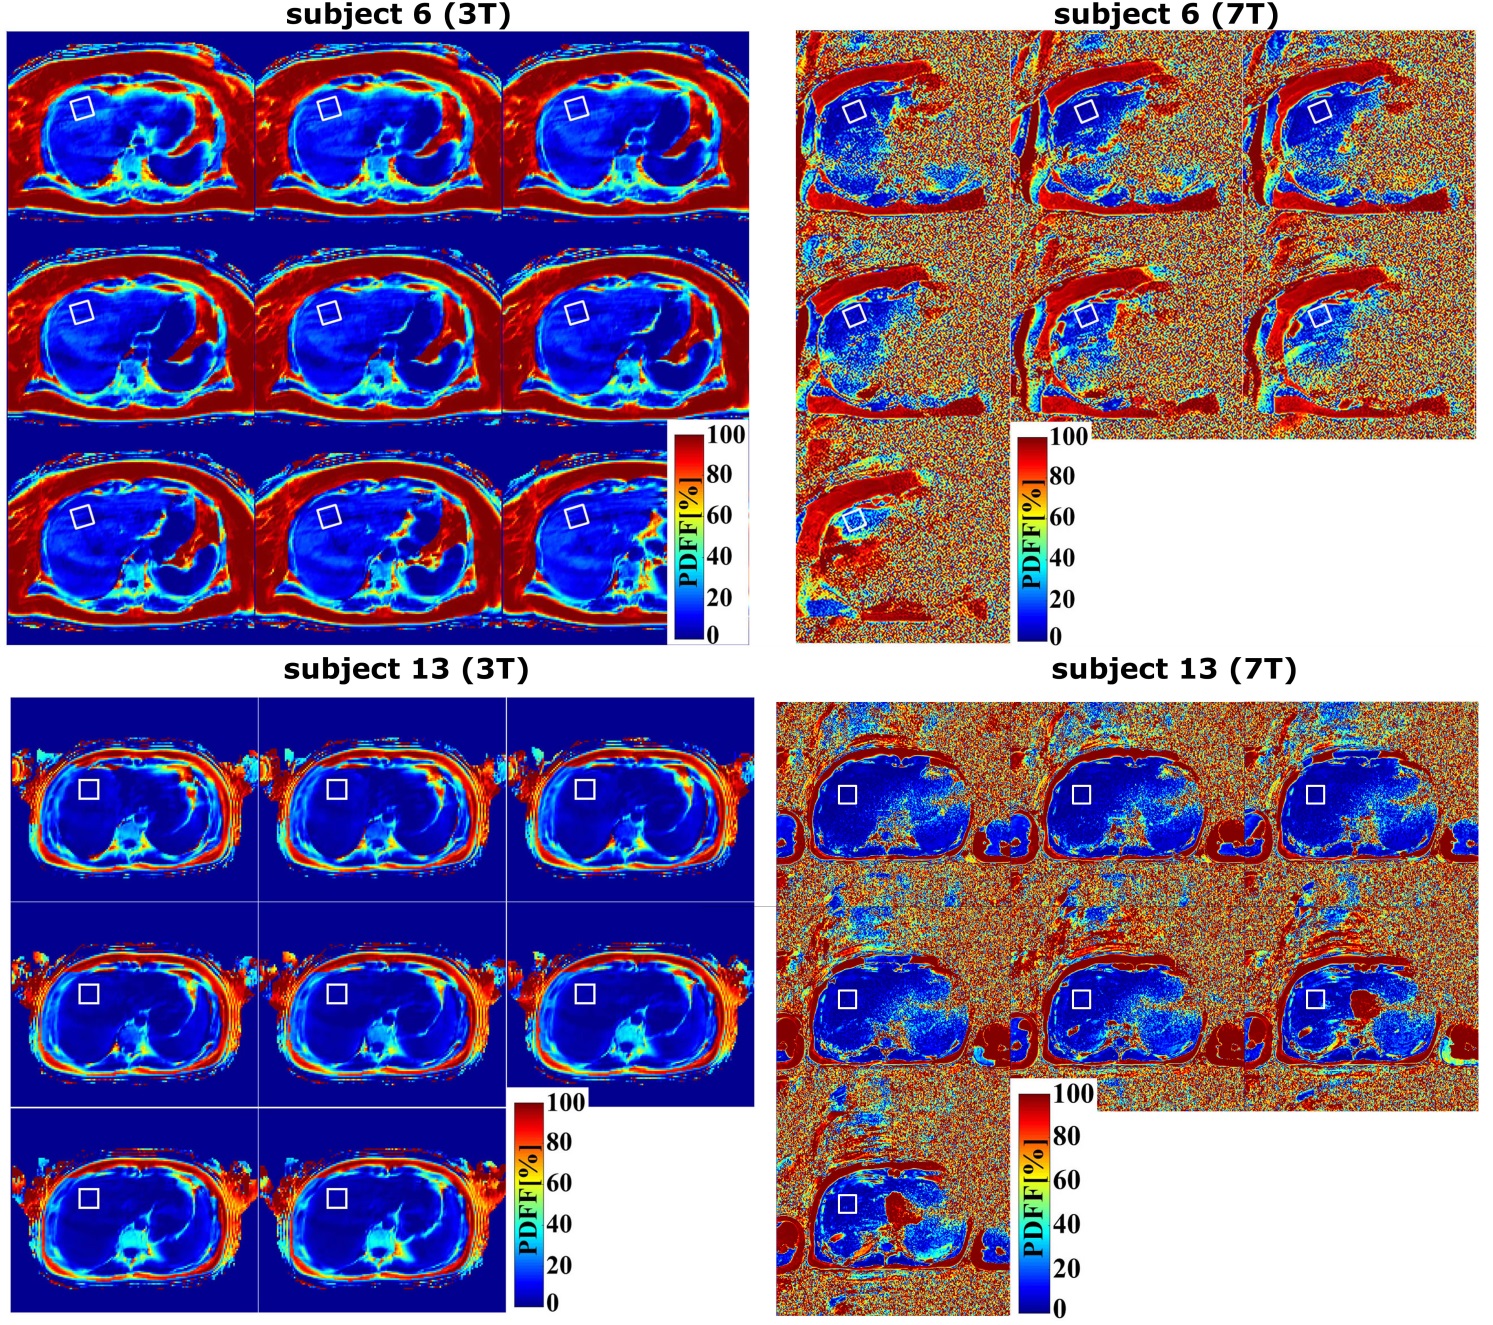


**Figure Supp1-1.** Examples (subjects S6 and S13) of MRI-PDFF maps of slices cutting the investigated volume of interest (VOI) at 3T and 7T fields. The position of the investigated volume that corresponds to the largest axial cross-section in the cranial section of the liver (same/similar as MRS) is depicted by white solid boxes in MRI-PDFF maps.


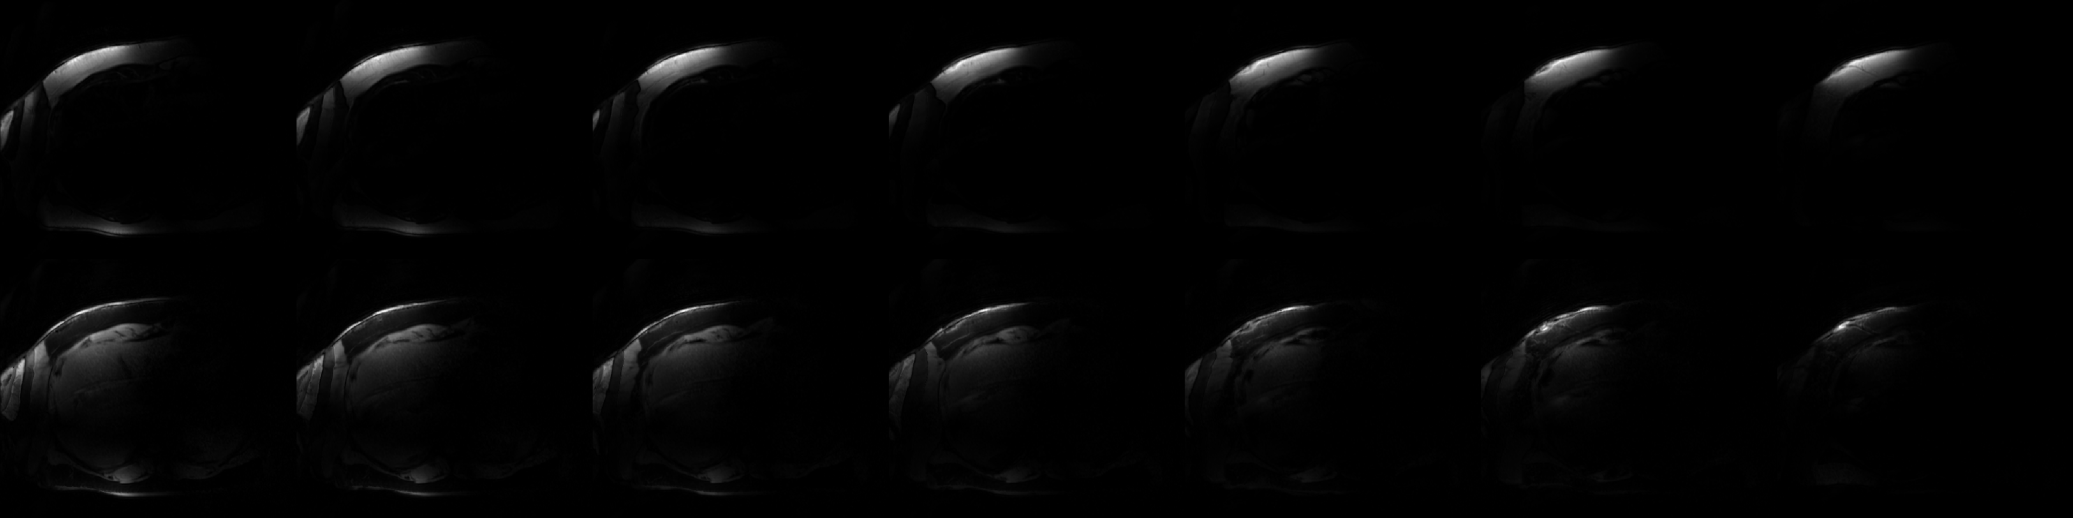


**Figure Supp1-2.** The anatomical reconstructed fat and water images of subject S6 at 7T field (related PDFF maps in Figure Supp1-1.).


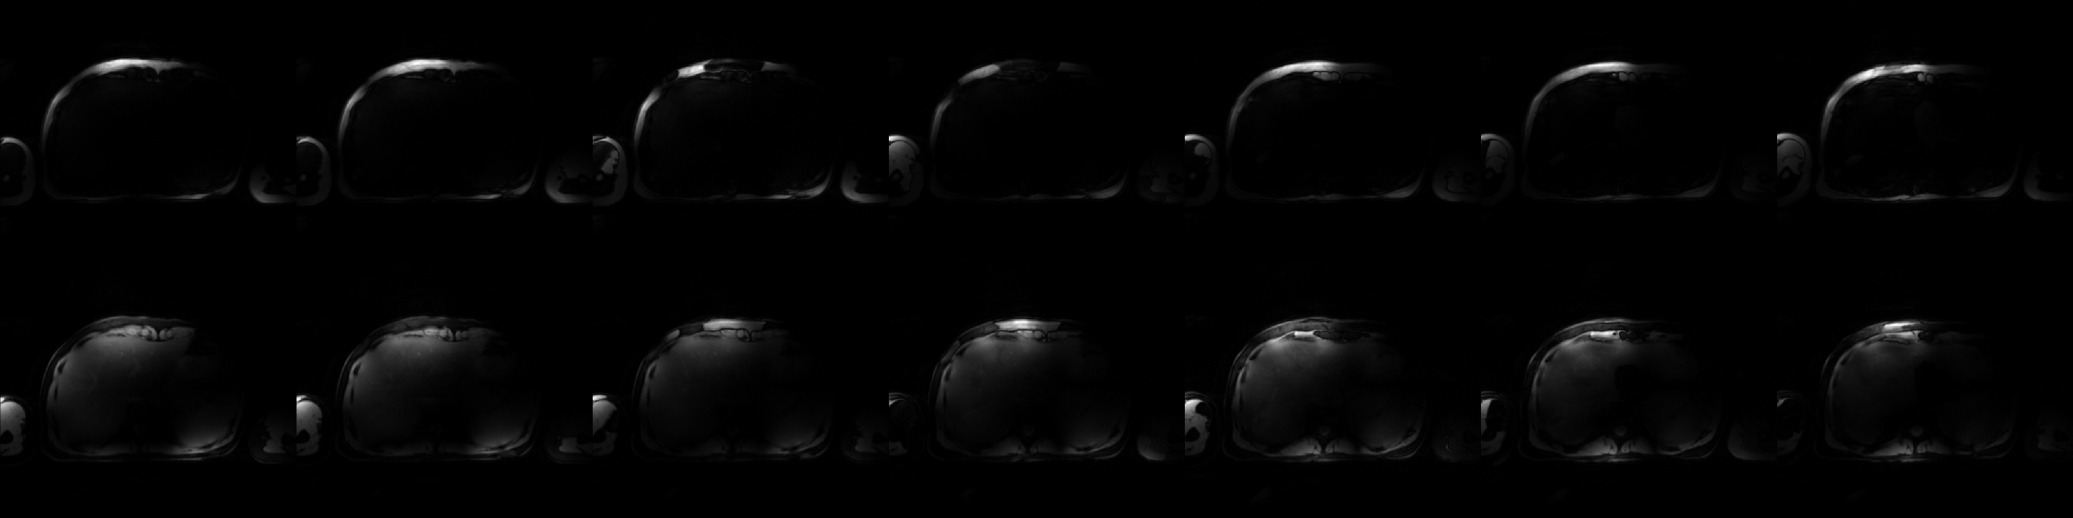


**Figure Supp1-3.** The anatomical reconstructed fat and water images of subject S13 at 7T field (related PDFF maps in Figure Supp1-1.).
